# Supplementary material
Source: publisher site journal article supplement (https://www.dovepress.com/article/426682)
Supplement: Supplementary file 1 [file get_supplementary_file.php]

**Electronic Supplementary Material**

**Photodynamic Cationic Ultrasmall Copper Oxide Nanoparticles-loaded Liposomes for Alleviation of MRSA Biofilms**

Xiangjun Chen#, Wenting Li#, Xueling Li, Keke Li, Guilong Zhang*, Wei Hong*

*School of Pharmacy, Shandong New Drug Loading & Release Technology and Preparation Engineering Laboratory, Binzhou Medical University,* *Yantai, P. R. China.*

**Corresponding author.* H.W. *Tel./ Fax.: +86-**0535-6908191*

*E-mail address:* [*hongwei_sy@* *bzmc.edu.cn*](mailto:hongwei_sy@163.com)

Z.GL. *Tel./ Fax.: +86-0535-* *6913719*

*E-mail address:* glzhang@bzmc.edu.cn

Xiangjun Chen and Wenting Li contributed equally to this work.

**1. Materials**

**1.1 Reagents**

1,2-distearoyl-sn-glycero-3-phospho-(1'-rac-glycerol) (DSPG), 1,2-dioleoyl-3-trimethylammonium-propane (DOTAP), 1,2-distearoyl-sn-glycero-3-phosphoethanolamine-Poly(2-ethyl-2-oxazoline) (DSPE-PEOz) and cholesterol (Chol) were purchased from Ruixi Biological Technology Co., Ltd (Xi’an, Shanxi, China). Chlorin e6 (Ce6) was purchased from Shanghai Macklin Biochemical Technology Co., Ltd. (Shanghai, China). Copper (II) chloride (CuCl2) and L-ascorbic acid were purchased from Shanghai Aladdin Biochemical Technology Co., Ltd. (Shanghai, China). 2',7'-dichlorodifluorescein diacetate (DCFH-DA) was purchased from MedChemExpress (Monmouth Junction, NJ, USA). A LIVE/DEAD® BacLight™ Bacterial Viability Kit (L7012) was purchased from Thermo Fisher Scientific Inc (Shanghai, China). A dialysis bag (MW, 100 kDa) was purchased from Shanghai yuanye Bio-Technology Co., Ltd (Shanghai, China).

**1.2 Bacteria and cells**

MRSA USA300 were purchased from Hangzhou BIOSCI Company (Hangzhou, China). Vero cells were purchased from American Type Culture Collection (Manassas, VA, USA), and cultured in DMEM media (Gibco BRL, Grand Island, NY) containing 10% FBS.

**1.3 Animals**

BALB/c mice were purchased from Pengyue Laboratory Animal Breeding Co., Ltd (Jinan, Shandong, China). The New Zealand white rabbits were purchased from Qingdao Kangda Biotechnology Co., Ltd (Qingdao, Shandong, China). The animal studies were conducted with approval from Institutional Animal Care and Use Committee of Binzhou Medical University. All procedures were performed in accordance with the Chinese National Laboratory Animal-Guideline for Ethical Review of Animal Welfare (GB/T 35892-2018).
